# Supplementary material for: Nonrandom Distribution of Azole Resistance across the Global Population of Aspergillus fumigatus
Source: PubMed Central journal article supplement (PMC6529631; doi:10.1128/mbio.00392-19), 2019-05-21
Supplement: mBio.00392-19-sf002.pdf [file mBio.00392-19-sf002.pdf]

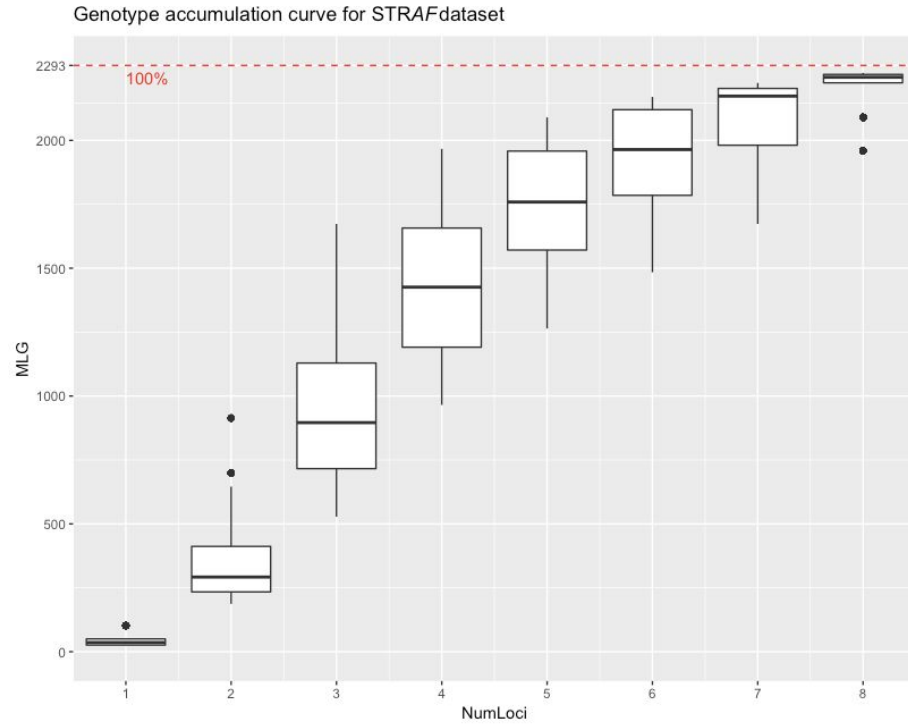

Fig S2: Genotype accumulation curve. Distributions generated using random sampling of loci 1000 times.
