# Supplementary material for: Nonrandom Distribution of Azole Resistance across the Global Population of Aspergillus fumigatus
Source: PubMed Central journal article supplement (PMC6529631; doi:10.1128/mbio.00392-19), 2019-05-21
Supplement: mBio.00392-19-sf008.pdf [file mBio.00392-19-sf008.pdf]

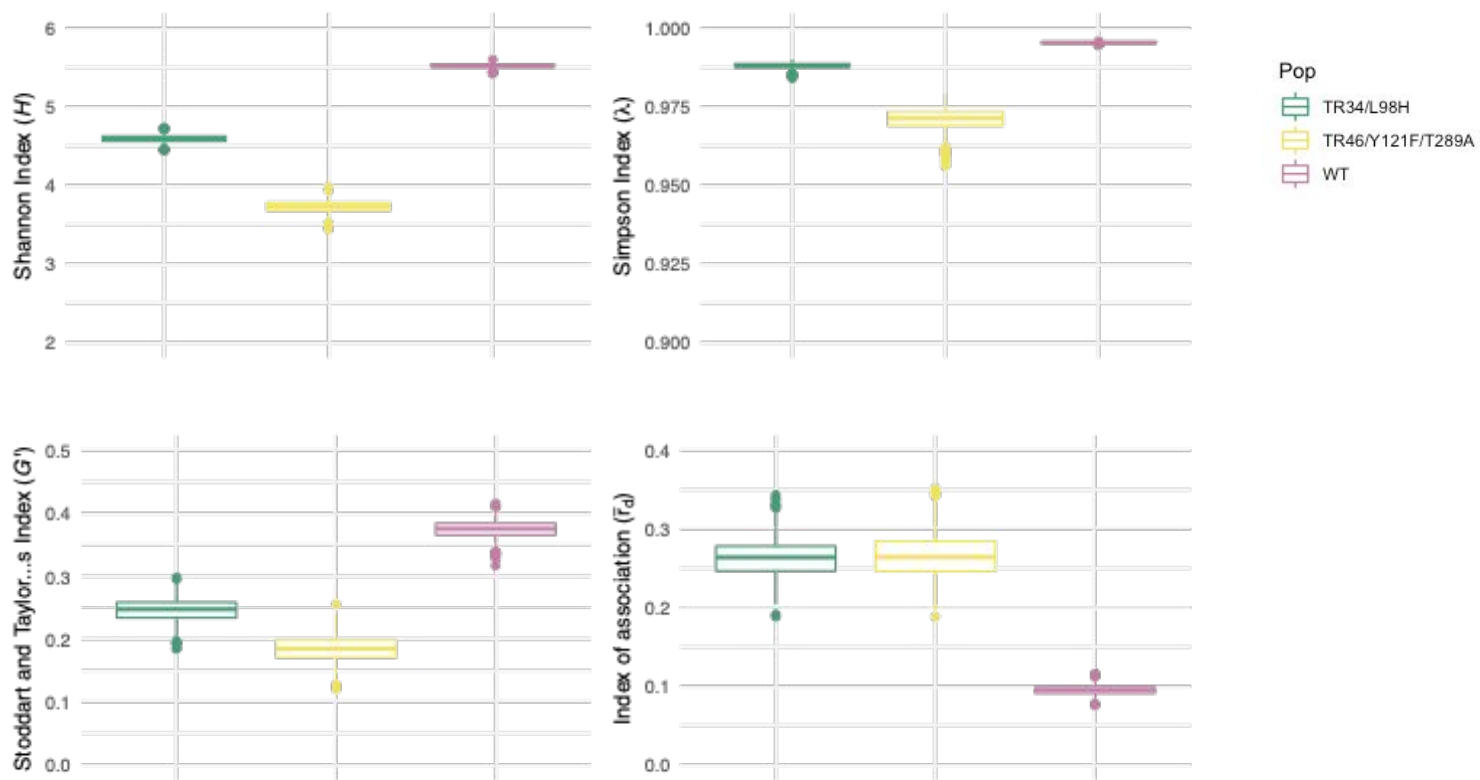

Fig S8: Clone-corrected genetic diversity indices of resistant *Aspergillus fumigatus* isolates harbouring either WT, TR34/L98H or TR46/Y121F/T289A CYP51A alleles.
