# Supplementary material for: Nonrandom Distribution of Azole Resistance across the Global Population of Aspergillus fumigatus
Source: PubMed Central journal article supplement (PMC6529631; doi:10.1128/mbio.00392-19), 2019-05-21
Supplement: mBio.00392-19-sf010.pdf [file mBio.00392-19-sf010.pdf]

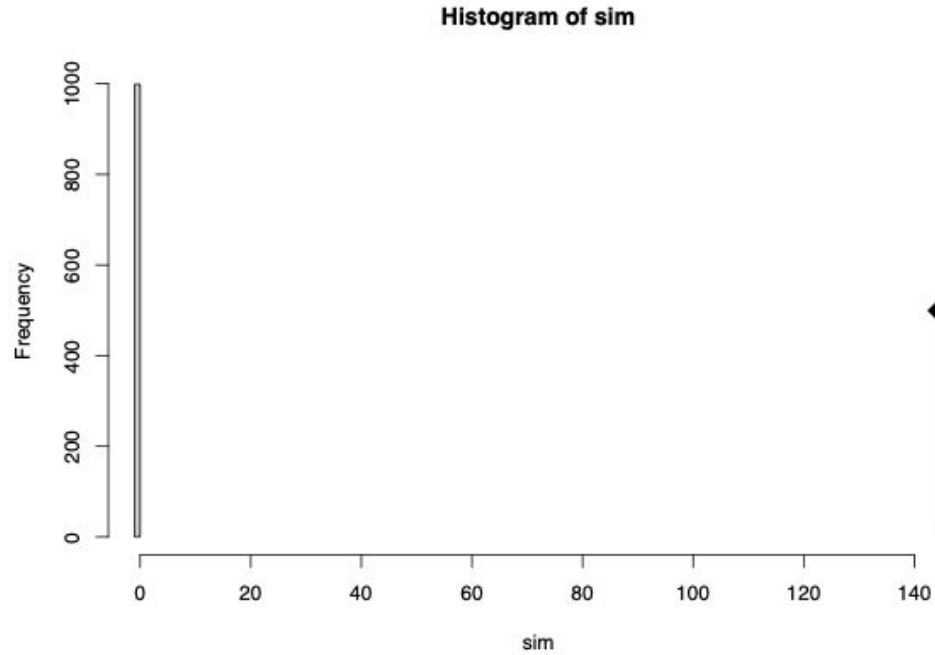

Fig S10: Histogram of simulated genotypes using hybridise function based on a Monte Carlo test with 999 replications. Marker represents the number of observed STRAf genotype duplicates (144).
